# Supplementary material for: Effects of hyperinsulinemia on pancreatic cancer development and the immune microenvironment revealed through single-cell transcriptomics
Source: PubMed Central journal article supplement (PMC8862319; doi:10.1186/s40170-022-00282-z), 2022-02-21

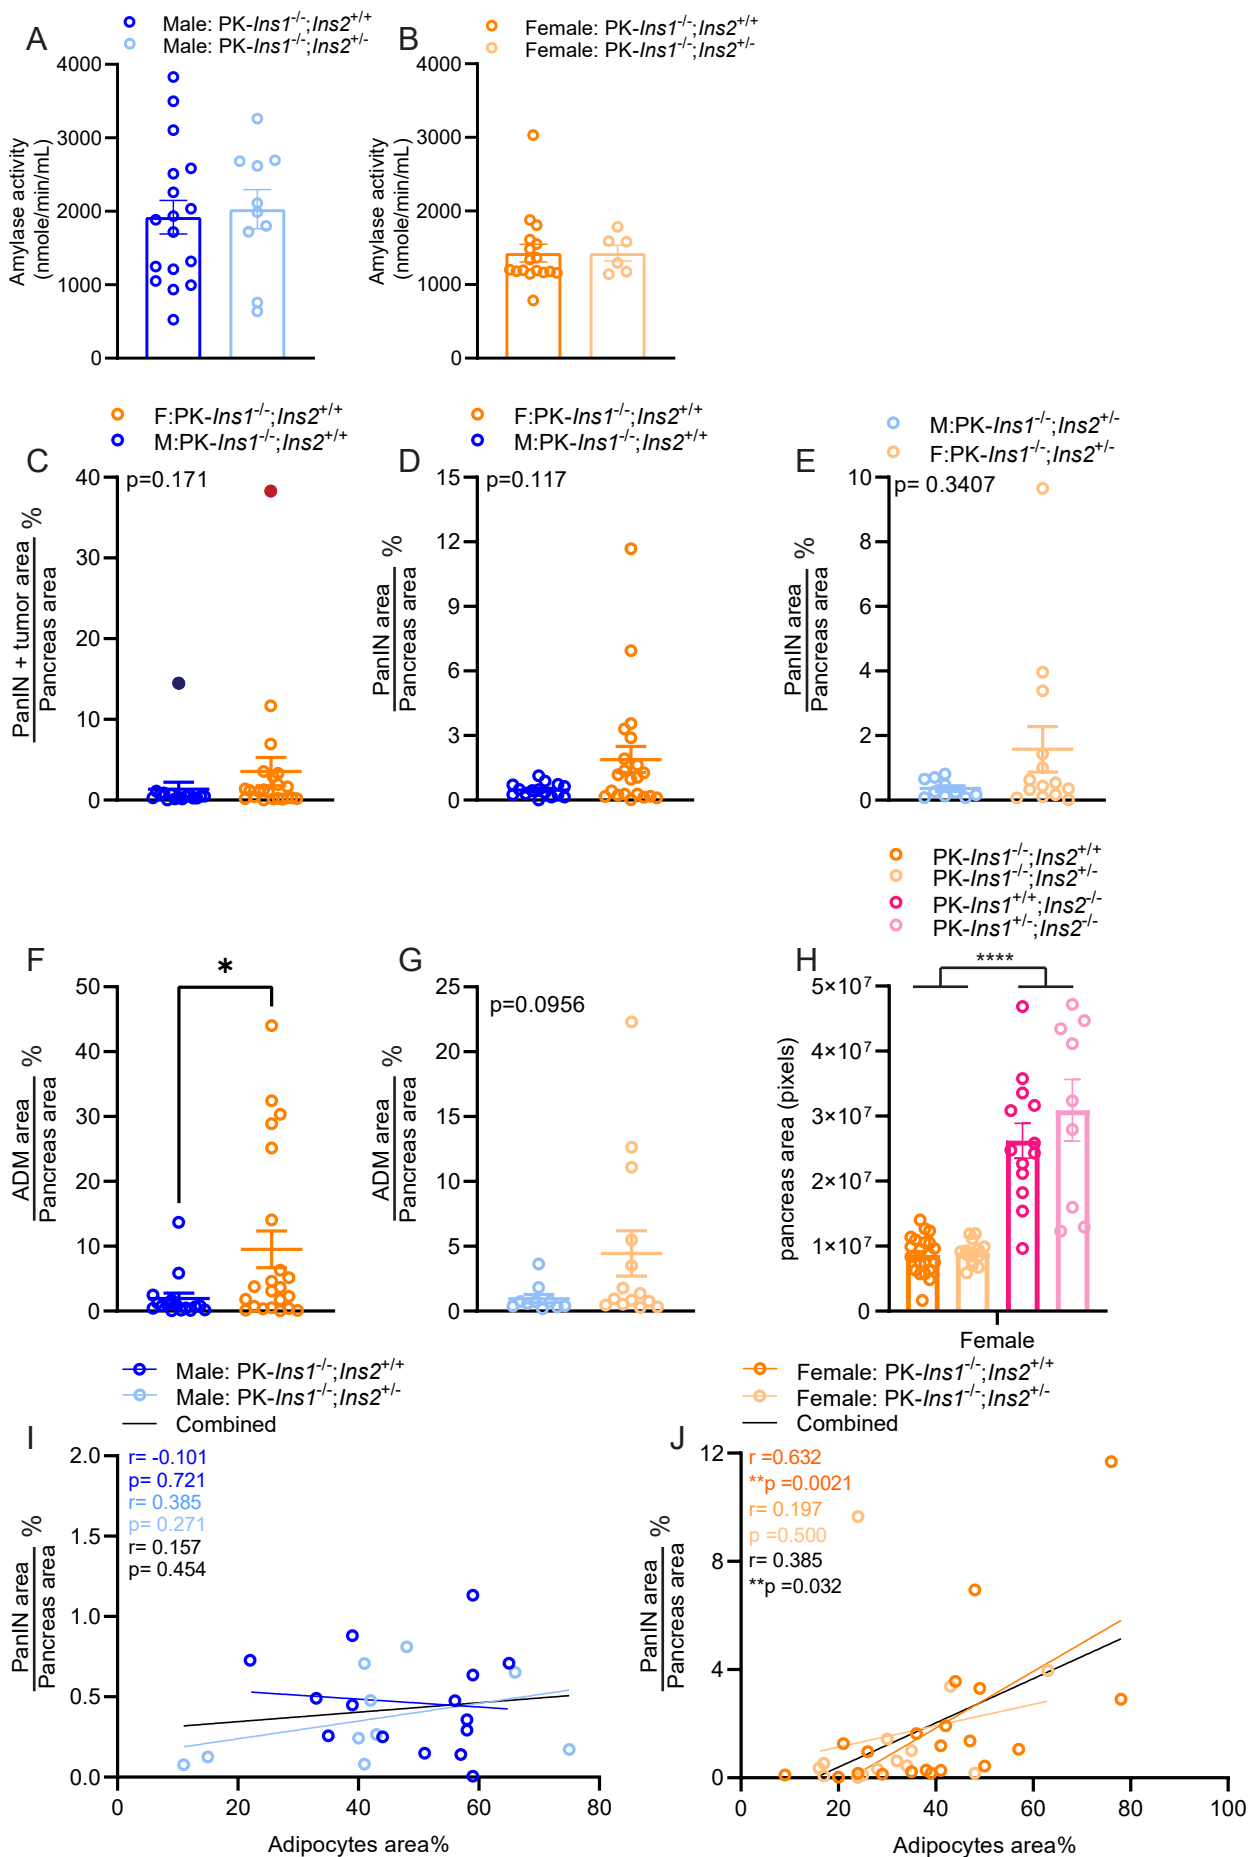

Supplement: 40170_2022_282_MOESM3_ESM.pdf [file 40170_2022_282_MOESM3_ESM.pdf]
